# Supplementary material for: Spatial distribution of bedrock landslides over the landscape evolution in NW Himalayan River catchments
Source: Copernicus journal article supplement (doi:10.5194/egusphere-2022-533), 2022-07-12
Supplement: Supplementary file 1 [file egusphere-2022-533-supplement.pdf]

| Samples | Study_Area | Publication           | Sample_Lon | Sample_Lat | Denudation rate (mm/y) |
|---------|------------|-----------------------|------------|------------|------------------------|
| 1       | Chenab     | Rao et al. (1997)     | 76.96      | 32.53      | <b>0.19</b>            |
| 2       | Chenab     | Rao et al. (1997)     | 75.86      | 33.46      | <b>0.35</b>            |
| 3       | Chenab     | Rao et al. (1997)     | 75.73      | 33.35      | <b>0.33</b>            |
| 4       | Chenab     | Rao et al. (1997)     | 75.74      | 33.36      | <b>0.6</b>             |
| 5       | Chenab     | Rao et al. (1997)     | 75.7       | 33.15      | <b>0.51</b>            |
| 6       | Chenab     | Rao et al. (1997)     | 75.14      | 33.24      | <b>0.72</b>            |
| 7       | Chenab     | Rao et al. (1997)     | 74.74      | 32.89      | <b>0.39</b>            |
| 8       | Sutlej     | Bookhagen et al. 2016 | 78.18      | 32.1       | <b>0.61</b>            |
| 9       | Sutlej     | Bookhagen et al. 2016 | 78.6       | 31.95      | <b>0.64</b>            |
| 10      | Sutlej     | Bookhagen et al. 2016 | 78.05      | 32.25      | <b>2.19</b>            |
| 11      | Sutlej     | Bookhagen et al. 2016 | 78.05      | 32.25      | <b>2.07</b>            |
| 12      | Sutlej     | Bookhagen et al. 2016 | 78.44      | 31.78      | <b>0.36</b>            |
| 13      | Sutlej     | Bookhagen et al. 2016 | 78.41      | 31.8       | <b>0.24</b>            |
| 14      | Sutlej     | Bookhagen et al. 2016 | 78.06      | 31.52      | <b>0.41</b>            |
| 15      | Sutlej     | Bookhagen et al. 2016 | 78.38      | 31.37      | <b>2.03</b>            |
| 16      | Yamuna     | Scherler et al., 2014 | 77.69      | 30.78      | <b>0.39</b>            |
| 17      | Yamuna     | Scherler et al., 2014 | 77.74      | 30.85      | <b>0.29</b>            |
| 18      | Yamuna     | Scherler et al., 2014 | 77.74      | 31.15      | <b>0.31</b>            |
| 19      | Yamuna     | Scherler et al., 2014 | 77.83      | 31.22      | <b>0.29</b>            |
| 20      | Yamuna     | Scherler et al., 2014 | 77.85      | 31.23      | <b>0.35</b>            |
| 21      | Yamuna     | Scherler et al., 2014 | 77.85      | 30.95      | <b>0.49</b>            |
| 22      | Yamuna     | Scherler et al., 2014 | 77.84      | 30.92      | <b>1.22</b>            |
| 23      | Yamuna     | Scherler et al., 2014 | 77.7       | 30.76      | <b>1.13</b>            |
| 24      | Yamuna     | Scherler et al., 2014 | 78.01      | 30.57      | <b>0.55</b>            |
| 25      | Yamuna     | Scherler et al., 2014 | 78.01      | 30.64      | <b>0.16</b>            |
| 26      | Yamuna     | Scherler et al., 2014 | 78.09      | 30.72      | <b>0.15</b>            |
| 27      | Yamuna     | Scherler et al., 2014 | 78.09      | 30.72      | <b>0.22</b>            |
| 28      | Yamuna     | Scherler et al., 2014 | 78.11      | 30.8       | <b>0.13</b>            |
| 29      | Yamuna     | Scherler et al., 2014 | 78.21      | 30.82      | <b>0.08</b>            |
| 30      | Yamuna     | Scherler et al., 2014 | 78.3       | 30.87      | <b>0.32</b>            |
| 31      | Yamuna     | Scherler et al., 2014 | 78.31      | 30.89      | <b>1.17</b>            |
| 32      | Yamuna     | Scherler et al., 2014 | 78.02      | 30.99      | <b>0.15</b>            |
| 33      | Yamuna     | Scherler et al., 2014 | 78.04      | 31.02      | <b>0.53</b>            |
| 34      | Yamuna     | Scherler et al., 2014 | 78.1       | 31.07      | <b>1.81</b>            |
| 35      | Yamuna     | Scherler et al., 2014 | 78.25      | 31.08      | <b>1.97</b>            |
| 36      | Yamuna     | Scherler et al., 2014 | 77.96      | 31.25      | <b>0.9</b>             |
| 37      | Yamuna     | Scherler et al., 2014 | 78.23      | 30.82      | <b>1.14</b>            |
| 38      | Yamuna     | Scherler et al., 2014 | 78.08      | 30.73      | <b>0.31</b>            |
| 39      | Ganges     | Morell et al., 2015   | 79.52      | 30.46      | <b>0.64</b>            |
| 40      | Ganges     | Morell et al., 2015   | 79.35      | 30.37      | <b>0.3</b>             |
| 41      | Ganges     | Morell et al., 2015   | 79.33      | 30.27      | <b>0.24</b>            |
| 42      | Ganges     | Morell et al., 2015   | 79.3       | 30.26      | <b>0.11</b>            |
| 43      | Ganges     | Morell et al., 2015   | 78.26      | 30.68      | <b>0.18</b>            |

|    |        |                     |       |       |             |
|----|--------|---------------------|-------|-------|-------------|
| 44 | Ganges | Morell et al., 2015 | 78.43 | 30.65 | <b>0.5</b>  |
| 45 | Ganges | Morell et al., 2015 | 78.32 | 30.76 | <b>0.15</b> |
| 46 | Ganges | Morell et al., 2015 | 78.35 | 30.79 | <b>0.27</b> |
| 47 | Ganges | Morell et al., 2015 | 78.39 | 30.79 | <b>0.14</b> |
| 48 | Ganges | Morell et al., 2015 | 78.58 | 30.78 | <b>0.48</b> |
| 49 | Ganges | Morell et al., 2015 | 78.51 | 30.79 | <b>0.34</b> |
| 50 | Ganges | Morell et al., 2015 | 79.54 | 30.5  | <b>0.55</b> |

| Error | Elevation(m) | Slope (degree) | Relief(m) | Annual precipitation(mm/y) |
|-------|--------------|----------------|-----------|----------------------------|
| 0     | 3117.08      | 24.00          | 1363.20   | 299.85                     |
| 0     | 1730.74      | 30.24          | 1042.89   | 1061.50                    |
| 0     | 1222.40      | 39.79          | 886.76    | 815.69                     |
| 0     | 1174.85      | 30.31          | 619.48    | 774.25                     |
| 0     | 1166.56      | 7.37           | 723.81    | 951.95                     |
| 0     | 919.91       | 26.92          | 695.53    | 1914.03                    |
| 0     | 311.94       | 1.75           | 34.00     | 1466.64                    |
| 0.11  | 3584.20      | 24.01          | 788.18    | 128.67                     |
| 0.05  | 3189.99      | 25.05          | 1144.41   | 149.52                     |
| 0.2   | 3610.07      | 5.63           | 707.89    | 116.74                     |
| 0.18  | 3610.07      | 5.63           | 707.89    | 116.74                     |
| 0.03  | 2941.24      | 8.51           | 828.91    | 112.85                     |
| 0.03  | 3217.60      | 13.94          | 959.97    | 81.29                      |
| 0.06  | 2017.85      | 38.74          | 1177.34   | 675.03                     |
| 0.49  | 3179.57      | 6.03           | 962.20    | 210.86                     |
| 0.03  | 1080.83      | 34.68          | 1219.40   | 2279.69                    |
| 0.02  | 998.27       | 33.72          | 1002.00   | 1714.94                    |
| 0.02  | 1459.60      | 13.10          | 694.55    | 1304.65                    |
| 0.02  | 1708.37      | 23.40          | 605.21    | 1408.48                    |
| 0.03  | 1935.94      | 34.31          | 939.71    | 1386.41                    |
| 0.04  | 1013.45      | 24.60          | 831.20    | 1709.09                    |
| 0.1   | 888.19       | 8.82           | 795.79    | 1481.34                    |
| 0.09  | 1061.29      | 35.56          | 697.26    | 2366.73                    |
| 0.04  | 929.22       | 7.92           | 832.79    | 2520.41                    |
| 0.01  | 840.60       | 11.19          | 700.54    | 2077.22                    |
| 0.01  | 1097.78      | 26.97          | 957.50    | 1539.49                    |
| 0.02  | 1097.78      | 26.97          | 957.50    | 1539.49                    |
| 0.01  | 1220.35      | 27.14          | 827.58    | 1525.01                    |
| 0.01  | 1286.22      | 21.87          | 514.90    | 1351.99                    |
| 0.02  | 1470.70      | 16.01          | 935.50    | 1816.67                    |
| 0.09  | 1758.87      | 32.14          | 1185.24   | 1720.00                    |
| 0.01  | 1139.09      | 13.89          | 518.82    | 2460.01                    |
| 0.04  | 1153.08      | 7.38           | 788.90    | 2094.50                    |
| 0.14  | 1328.94      | 27.00          | 900.34    | 1832.27                    |
| 0.16  | 2032.95      | 4.23           | 1006.40   | 2508.33                    |
| 0.07  | 2124.97      | 30.17          | 986.33    | 1637.83                    |
| 0.09  | 1220.75      | 15.83          | 697.54    | 1565.31                    |
| 0.02  | 958.86       | 3.92           | 873.54    | 1545.21                    |
| 0.15  | 2745.10      | 25.21          | 1398.96   | 2441.04                    |
| 0.05  | 1642.17      | 17.87          | 1253.94   | 1626.84                    |
| 0.06  | 1873.81      | 34.33          | 963.01    | 1487.11                    |
| 0.02  | 1537.48      | 10.09          | 865.17    | 1592.15                    |
| 0.05  | 1987.92      | 7.81           | 764.10    | 1553.40                    |

|      |         |       |         |         |
|------|---------|-------|---------|---------|
| 0.13 | 1406.79 | 11.95 | 858.98  | 1945.92 |
| 0.02 | 1595.27 | 24.06 | 951.60  | 1682.49 |
| 0.06 | 2194.94 | 40.37 | 1179.05 | 2013.02 |
| 0.03 | 1700.63 | 22.73 | 855.61  | 1995.74 |
| 0.08 | 1981.99 | 24.69 | 1262.41 | 2318.27 |
| 0.14 | 1949.35 | 13.00 | 1376.74 | 2161.93 |
| 0.08 | 2441.33 | 25.95 | 1291.94 | 2514.10 |

| Geophysical Relief (m) | Exhumation Age (Ma) |
|------------------------|---------------------|
| 1844.30                | <b>9.71</b>         |
| 1973.53                | <b>5.64</b>         |
| 2441.17                | <b>7.40</b>         |
| 2811.73                | <b>4.69</b>         |
| 2416.64                | <b>4.74</b>         |
| 1493.28                | <b>2.07</b>         |
| 342.24                 | <b>0.88</b>         |
| 2397.06                | <b>3.93</b>         |
| 2739.30                | <b>4.28</b>         |
| 2385.83                | <b>1.09</b>         |
| 2385.83                | <b>1.15</b>         |
| 1932.69                | <b>5.37</b>         |
| 1758.44                | <b>7.33</b>         |
| 2973.30                | <b>7.25</b>         |
| 2171.02                | <b>1.07</b>         |
| 172.00                 | <b>0.44</b>         |
| 981.99                 | <b>3.39</b>         |
| 1520.65                | <b>4.91</b>         |
| 1903.38                | <b>6.56</b>         |
| 1590.71                | <b>4.54</b>         |
| 1739.97                | <b>3.55</b>         |
| 1515.77                | <b>1.24</b>         |
| 125.00                 | <b>0.11</b>         |
| 1413.95                | <b>2.57</b>         |
| 1486.77                | <b>9.29</b>         |
| 1394.57                | <b>9.30</b>         |
| 1394.57                | <b>6.34</b>         |
| 1112.06                | <b>8.55</b>         |
| 1203.41                | <b>15.04</b>        |
| 1447.55                | <b>4.52</b>         |
| 1302.86                | <b>1.11</b>         |
| 1349.02                | <b>8.99</b>         |
| 1506.48                | <b>2.84</b>         |
| 3534.90                | <b>1.95</b>         |
| 3249.68                | <b>1.65</b>         |
| 2159.38                | <b>2.40</b>         |
| 1306.54                | <b>1.15</b>         |
| 1396.33                | <b>4.50</b>         |
| 1439.23                | <b>2.25</b>         |
| 871.37                 | <b>2.90</b>         |
| 888.39                 | <b>3.70</b>         |
| 970.50                 | <b>8.82</b>         |
| 339.98                 | <b>1.89</b>         |

|         |             |
|---------|-------------|
| 995.44  | <b>1.99</b> |
| 893.66  | <b>5.96</b> |
| 529.76  | <b>1.96</b> |
| 1047.51 | <b>7.48</b> |
| 1855.89 | <b>3.87</b> |
| 1528.07 | <b>4.49</b> |
| 4047.03 | <b>7.36</b> |
